# Supplementary material
Source: PubMed Central journal article supplement (PMC6878189)
Supplement: NIHMS1539377-supplement-1.pdf [file NIHMS1539377-supplement-1.pdf]

Supplementary Table 1. Rank Order of Symptom Occurrence, Severity, and Distress Ratings Over One Cycle of Chemotherapy

| Occurrence Rates              |                                           |            |                                           |            |                                           |            |
|-------------------------------|-------------------------------------------|------------|-------------------------------------------|------------|-------------------------------------------|------------|
| Rank                          | T1                                        |            | T2                                        |            | T3                                        |            |
|                               | Symptom                                   | %          | Symptom                                   | %          | Symptom                                   | %          |
| 1                             | Lack of energy                            | 79.1       | Lack of energy                            | 76.2       | Lack of energy                            | 67.2       |
| 2                             | Numbness/tingling in hands/feet           | 62.2       | Numbness/tingling in hands/feet           | 63.4       | Difficulty sleeping                       | 55.1       |
| 3                             | Difficulty sleeping                       | 60.7       | Difficulty sleeping                       | 56.6       | Numbness/tingling in hands/feet           | 54.4       |
| 4                             | Pain                                      | 59.4       | Feeling drowsy                            | 56.6       | Pain                                      | 50.6       |
| 5                             | Feeling drowsy                            | 57.1       | Nausea                                    | 55.1       | Feeling drowsy                            | 46.9       |
| 6                             | Nausea                                    | 50.9       | Pain                                      | 52.4       | Nausea                                    | 43.1       |
| 7                             | Change in the way food tastes             | 49.9       | Change in the way food tastes             | 47.1       | Change in the way food tastes             | 39.8       |
| 8                             | Worrying                                  | 47.1       | Lack of appetite                          | 46.4       | Difficulty concentrating                  | 39.3       |
| 9                             | Difficulty concentrating                  | 44.6       | Difficulty concentrating                  | 43.9       | Lack of appetite                          | 36.3       |
| 10                            | Dry mouth                                 | 44.4       | Hair loss                                 | 39.8       | Worrying                                  | 35.1       |
| Severity Ratings <sup>a</sup> |                                           |            |                                           |            |                                           |            |
| Rank                          | T1                                        |            | T2                                        |            | T3                                        |            |
|                               | Symptom                                   | Mean (SD)  | Symptom                                   | Mean (SD)  | Symptom                                   | Mean (SD)  |
| 1                             | Problems with sexual interest or activity | 2.39 (1.0) | Problems with sexual interest or activity | 2.42 (0.9) | Problems with sexual interest or activity | 2.49 (0.9) |
| 2                             | Change in the way food tastes             | 2.10 (0.8) | Change in the way food tastes             | 2.12 (0.8) | Lack of energy                            | 2.05 (0.7) |
| 3                             | Lack of energy                            | 2.03 (0.7) | Swelling of arms or legs                  | 2.11 (0.9) | Lack of appetite                          | 2.01 (0.8) |
| 4                             | Difficulty sleeping                       | 1.99 (0.7) | Lack of energy                            | 2.06 (0.7) | Pain                                      | 1.97 (0.7) |
| 5                             | Constipation                              | 1.99 (0.8) | Diarrhea                                  | 2.03 (0.8) | Constipation                              | 1.96 (0.8) |
| 6                             | Lack of appetite                          | 1.98 (0.8) | Lack of appetite                          | 2.01 (0.7) | Difficulty sleeping                       | 1.94 (0.7) |
| 7                             | Diarrhea                                  | 1.97 (0.8) | Numbness/tingling in hands/feet           | 1.99 (0.8) | Feeling bloated                           | 1.93 (0.7) |
| 8                             | Swelling of arms or legs                  | 1.97 (0.8) | Difficulty sleeping                       | 1.98 (0.7) | Change in the way food tastes             | 1.92 (0.8) |
| 9                             | Numbness/tingling in hands/feet           | 1.95 (0.8) | Constipation                              | 1.96 (0.7) | Abdominal cramps                          | 1.92 (0.7) |
| 10                            | Hair loss                                 | 1.95 (0.9) | Feeling bloated                           | 1.96 (0.8) | Changes in skin                           | 1.91 (0.8) |
| Distress Ratings <sup>b</sup> |                                           |            |                                           |            |                                           |            |
| Rank                          | T1                                        |            | T2                                        |            | T3                                        |            |
|                               | Symptom                                   | Mean (SD)  | Symptom                                   | Mean (SD)  | Symptom                                   | Mean (SD)  |
| 1                             | “I don’t look like myself”                | 1.77 (1.1) | Problems with sexual interest or activity | 2.01 (1.2) | Problems with sexual interest or activity | 1.96 (1.2) |

|    |                         |            |                               |            |                     |            |
|----|-------------------------|------------|-------------------------------|------------|---------------------|------------|
| 2  | Difficulty swallowing   | 1.77 (1.2) | Lack of energy                | 1.88 (1.0) | Pain                | 1.75 (1.1) |
| 3  | Difficulty sleeping     | 1.73 (1.3) | "I don't look like myself"    | 1.81 (1.2) | Lack of energy      | 1.71 (1.1) |
| 4  | Vomiting                | 1.73 (1.1) | Pain                          | 1.79 (1.0) | Changes in skin     | 1.70 (1.2) |
| 5  | Lack of energy          | 1.72 (1.1) | Change in the way food tastes | 1.77 (1.2) | Hair loss           | 1.69 (1.2) |
| 6  | Pain                    | 1.72 (1.1) | Hair loss                     | 1.71 (1.2) | Abdominal cramps    | 1.62 (1.0) |
| 7  | Nausea                  | 1.68 (1.1) | Diarrhea                      | 1.71 (1.1) | Constipation        | 1.60 (1.1) |
| 8  | Problems with urination | 1.68 (1.2) | Difficulty sleeping           | 1.70 (1.0) | Feeling bloated     | 1.60 (1.0) |
| 9  | Constipation            | 1.67 (1.2) | Feeling bloated               | 1.70 (1.1) | Difficulty sleeping | 1.57 (1.0) |
| 10 | Diarrhea                | 1.65 (1.1) | Vomiting                      | 1.68 (1.1) | Diarrhea            | 1.57 (1.1) |
|    | Feeling bloated         | 1.65 (1.3) |                               |            |                     |            |

Abbreviation: SD = standard deviation

Timing of symptom assessments: Time 1 = prior to the initiation of next cycle of chemotherapy (i.e, recovery from the second or third cycle of chemotherapy), Time 2 = approximately one week after chemotherapy (i.e., acute symptoms), Time 3 = approximately two weeks after chemotherapy (i.e., potential nadir).

<sup>a</sup>Severity ratings without zeros: 1 = slight, 2 = moderate, 3 = severe, 4 = very severe.

<sup>b</sup>Distress ratings: 0 = not at all, 1 = a little bit, 2 = somewhat, 3 = quite a bit, 4 = very much.

Supplementary Table 2. Exploratory Factory Analysis Using Ratings of Symptom Occurrence Prior to the Initiation of Next Dose of Chemotherapy (Time 1)<sup>a</sup>

| Symptoms                                  | Factor 1                      | Factor 2                             | Factor 3                         | Factor 4                      |
|-------------------------------------------|-------------------------------|--------------------------------------|----------------------------------|-------------------------------|
|                                           | Psychological Symptom Cluster | Chemotherapy-related Symptom Cluster | Gastrointestinal Symptom Cluster | Weight change Symptom Cluster |
| Lack of energy                            | <b>0.463</b>                  | 0.307                                | 0.135                            | -0.128                        |
| Difficulty concentrating                  | <b>0.712</b>                  | 0.057                                | 0.023                            | -0.079                        |
| Feeling nervous                           | <b>0.822</b>                  | 0.030                                | -0.113                           | -0.011                        |
| Feeling drowsy                            | <b>0.404</b>                  | 0.365                                | -0.014                           | -0.036                        |
| Feeling sad                               | <b>0.863</b>                  | -0.039                               | -0.017                           | -0.016                        |
| Worrying                                  | <b>0.895</b>                  | -0.213                               | 0.115                            | -0.001                        |
| Feeling irritable                         | <b>0.642</b>                  | 0.080                                | 0.095                            | 0.025                         |
| Dry mouth                                 | 0.084                         | <b>0.451</b>                         | -0.039                           | 0.121                         |
| Nausea                                    | 0.025                         | <b>0.464</b>                         | 0.330                            | -0.056                        |
| Itching                                   | 0.048                         | <b>0.489</b>                         | -0.174                           | 0.337                         |
| Lack of appetite                          | -0.162                        | <b>0.844</b>                         | 0.083                            | -0.147                        |
| Weight loss                               | -0.022                        | <b>0.617</b>                         | 0.059                            | -0.220                        |
| Change in the way food tastes             | 0.035                         | <b>0.466</b>                         | 0.035                            | 0.158                         |
| Changes in skin                           | <b>0.420</b>                  | <b>0.500</b>                         | -0.232                           | 0.047                         |
| Dizziness                                 | 0.073                         | <b>0.504</b>                         | 0.094                            | 0.121                         |
| Feeling bloated                           | 0.072                         | 0.083                                | <b>0.689</b>                     | 0.126                         |
| Abdominal cramps                          | 0.052                         | -0.001                               | <b>0.734</b>                     | 0.159                         |
| Constipation                              | 0.011                         | 0.302                                | <b>0.431</b>                     | -0.116                        |
| Increased appetite                        | -0.061                        | 0.047                                | 0.094                            | <b>0.836</b>                  |
| Weight gain                               | -0.005                        | -0.139                               | 0.024                            | <b>0.962</b>                  |
| Pain                                      | 0.310                         | -0.034                               | 0.268                            | 0.061                         |
| Cough                                     | 0.231                         | 0.268                                | -0.138                           | 0.141                         |
| Numbness/tingling in hands/feet           | 0.147                         | 0.185                                | 0.086                            | 0.020                         |
| Difficulty sleeping                       | 0.254                         | 0.265                                | 0.109                            | 0.084                         |
| Diarrhea                                  | 0.006                         | 0.207                                | 0.341                            | 0.145                         |
| Sweats                                    | 0.333                         | 0.051                                | 0.169                            | 0.187                         |
| Problems with sexual interest or activity | 0.341                         | 0.177                                | 0.065                            | 0.077                         |
| Hair loss                                 | 0.105                         | 0.320                                | 0.000                            | 0.190                         |
| "I don't look like myself"                | 0.241                         | 0.272                                | -0.007                           | 0.121                         |

<sup>a</sup>Extraction method: unweighted least squares. Rotation method: Geomin (oblique) rotation. Bold fonts indicate factor loading for symptom was >0.40.

Supplementary Table 3. Exploratory Factory Analysis Using Ratings of Symptom Occurrence Approximately One Week After Chemotherapy Administration (Time 2)<sup>a</sup>

| Symptoms                                  | Factor 1                      | Factor 2                             | Factor 3                      | Factor 4                   |
|-------------------------------------------|-------------------------------|--------------------------------------|-------------------------------|----------------------------|
|                                           | Psychological Symptom Cluster | Chemotherapy-related Symptom Cluster | Weight change Symptom Cluster | Epithelial Symptom Cluster |
| Lack of energy                            | <b>0.414</b>                  | <b>0.486</b>                         | -0.164                        | -0.012                     |
| Cough                                     | -0.007                        | <b>0.501</b>                         | 0.114                         | -0.027                     |
| Dry mouth                                 | -0.105                        | <b>0.641</b>                         | 0.059                         | 0.095                      |
| Nausea                                    | 0.002                         | <b>0.702</b>                         | -0.040                        | -0.083                     |
| Abdominal cramps                          | 0.095                         | <b>0.530</b>                         | 0.132                         | -0.114                     |
| Lack of appetite                          | 0.058                         | <b>0.688</b>                         | <b>-0.419</b>                 | 0.110                      |
| Weight loss                               | -0.006                        | <b>0.453</b>                         | -0.330                        | 0.132                      |
| Feeling bloated                           | 0.188                         | <b>0.478</b>                         | 0.092                         | -0.091                     |
| Diarrhea                                  | -0.003                        | <b>0.476</b>                         | -0.136                        | -0.106                     |
| Feeling drowsy                            | 0.283                         | <b>0.447</b>                         | 0.012                         | 0.003                      |
| Numbness/tingling in hands/feet           | -0.060                        | <b>0.489</b>                         | 0.041                         | 0.017                      |
| Difficulty concentrating                  | <b>0.653</b>                  | 0.175                                | -0.023                        | 0.068                      |
| Feeling nervous                           | <b>0.656</b>                  | 0.120                                | 0.007                         | 0.042                      |
| Feeling sad                               | <b>0.814</b>                  | -0.006                               | -0.072                        | 0.061                      |
| Worrying                                  | <b>0.926</b>                  | 0.079                                | 0.000                         | -0.077                     |
| Feeling irritable                         | <b>0.654</b>                  | 0.061                                | -0.088                        | 0.114                      |
| Problems with sexual interest or activity | <b>0.510</b>                  | 0.030                                | 0.100                         | -0.153                     |
| “I don’t look like myself”                | <b>0.403</b>                  | 0.026                                | -0.001                        | 0.347                      |
| Increased appetite                        | -0.026                        | 0.228                                | <b>0.784</b>                  | 0.065                      |
| Weight gain                               | 0.107                         | -0.033                               | <b>0.808</b>                  | 0.024                      |
| Hair loss                                 | 0.282                         | 0.034                                | 0.153                         | <b>0.420</b>               |
| Change in the way food tastes             | -0.029                        | <b>0.439</b>                         | -0.141                        | <b>0.573</b>               |
| Changes in skin                           | 0.312                         | -0.087                               | 0.034                         | <b>0.610</b>               |
| Itching                                   | 0.172                         | 0.145                                | 0.203                         | 0.339                      |
| Constipation                              | 0.122                         | 0.384                                | -0.035                        | -0.030                     |
| Pain                                      | 0.390                         | 0.273                                | 0.030                         | -0.317                     |
| Difficulty sleeping                       | 0.308                         | 0.329                                | 0.099                         | -0.055                     |
| Sweats                                    | 0.249                         | 0.324                                | 0.169                         | -0.021                     |
| Dizziness                                 | 0.200                         | 0.338                                | 0.079                         | 0.195                      |

<sup>a</sup>Extraction method: unweighted least squares. Rotation method: Geomin (oblique) rotation. Bold fonts indicate factor loading for symptom was >0.40.

Supplementary Table 4. Exploratory Factory Analysis Using Ratings of Symptom Occurrence Approximately Two Weeks After Chemotherapy Administration (Time 3)<sup>a</sup>

| Symptoms                                  | Factor 1                      | Factor 2                             | Factor 3                      | Factor 4                   |
|-------------------------------------------|-------------------------------|--------------------------------------|-------------------------------|----------------------------|
|                                           | Psychological Symptom Cluster | Chemotherapy-related Symptom Cluster | Weight change Symptom Cluster | Epithelial Symptom Cluster |
| Lack of energy                            | <b>0.544</b>                  | <b>0.462</b>                         | 0.018                         | -0.044                     |
| Difficulty concentrating                  | <b>0.510</b>                  | 0.255                                | -0.006                        | 0.025                      |
| Feeling nervous                           | <b>0.787</b>                  | -0.012                               | 0.009                         | 0.007                      |
| Difficulty sleeping                       | <b>0.421</b>                  | 0.272                                | 0.129                         | 0.054                      |
| Feeling sad                               | <b>0.943</b>                  | -0.174                               | -0.023                        | 0.131                      |
| Worrying                                  | <b>0.951</b>                  | -0.040                               | -0.011                        | -0.119                     |
| Feeling irritable                         | <b>0.585</b>                  | 0.050                                | -0.127                        | 0.277                      |
| Problems with sexual interest or activity | <b>0.463</b>                  | 0.043                                | -0.095                        | 0.136                      |
| Cough                                     | -0.072                        | <b>0.545</b>                         | -0.013                        | 0.026                      |
| Dry mouth                                 | 0.196                         | <b>0.535</b>                         | 0.029                         | 0.011                      |
| Nausea                                    | 0.184                         | <b>0.560</b>                         | -0.042                        | -0.079                     |
| Abdominal cramps                          | 0.206                         | <b>0.478</b>                         | -0.049                        | -0.035                     |
| Weight loss                               | -0.092                        | <b>0.618</b>                         | <b>-0.412</b>                 | 0.159                      |
| Lack of appetite                          | 0.034                         | <b>0.690</b>                         | <b>-0.467</b>                 | 0.029                      |
| Change in the way food tastes             | -0.081                        | <b>0.505</b>                         | 0.048                         | 0.201                      |
| Diarrhea                                  | 0.034                         | <b>0.497</b>                         | -0.244                        | -0.043                     |
| Feeling drowsy                            | 0.196                         | <b>0.535</b>                         | 0.029                         | 0.011                      |
| Increased appetite                        | -0.068                        | 0.174                                | <b>0.600</b>                  | 0.113                      |
| Weight gain                               | 0.001                         | -0.024                               | <b>1.020</b>                  | 0.038                      |
| “I don’t look like myself”                | 0.303                         | 0.081                                | 0.151                         | <b>0.513</b>               |
| Changes in skin                           | 0.278                         | -0.016                               | -0.059                        | <b>0.666</b>               |
| Itching                                   | -0.020                        | -0.036                               | 0.106                         | <b>0.622</b>               |
| Feeling bloated                           | 0.388                         | 0.315                                | 0.138                         | -0.223                     |
| Numbness/tingling in hands/feet           | 0.093                         | 0.324                                | 0.136                         | -0.051                     |
| Pain                                      | 0.315                         | 0.251                                | 0.162                         | -0.097                     |
| Hair loss                                 | 0.115                         | 0.246                                | 0.098                         | 0.315                      |
| Constipation                              | 0.347                         | 0.295                                | -0.006                        | 0.033                      |
| Sweats                                    | 0.396                         | 0.088                                | 0.253                         | 0.022                      |
| Dizziness                                 | 0.194                         | 0.354                                | 0.133                         | 0.203                      |

<sup>a</sup>Extraction method: unweighted least squares. Rotation method: Geomin (oblique) rotation. Bold fonts indicate factor loading for symptom was >0.40.

Supplementary Table 5. Exploratory Factory Analysis Using Ratings of Symptom Severity Prior to the Initiation of Next Dose of Chemotherapy (Time 1)<sup>a</sup>

| Symptoms                                  | Factor 1                      | Factor 2                             | Factor 3                         | Factor 4                      |
|-------------------------------------------|-------------------------------|--------------------------------------|----------------------------------|-------------------------------|
|                                           | Psychological Symptom Cluster | Chemotherapy-related Symptom Cluster | Gastrointestinal Symptom Cluster | Weight change Symptom Cluster |
| Lack of energy                            | <b>0.498</b>                  | 0.218                                | 0.151                            | -0.248                        |
| Difficulty concentrating                  | <b>0.716</b>                  | 0.052                                | 0.009                            | -0.107                        |
| Feeling nervous                           | <b>0.775</b>                  | -0.062                               | 0.006                            | 0.045                         |
| Feeling drowsy                            | <b>0.458</b>                  | 0.271                                | 0.033                            | -0.124                        |
| Feeling sad                               | <b>0.845</b>                  | -0.064                               | -0.057                           | 0.030                         |
| Worrying                                  | <b>0.800</b>                  | -0.105                               | 0.063                            | 0.025                         |
| Feeling irritable                         | <b>0.528</b>                  | 0.094                                | 0.175                            | 0.040                         |
| Problems with sexual interest or activity | <b>0.428</b>                  | 0.149                                | -0.006                           | -0.044                        |
| Dizziness                                 | 0.051                         | <b>0.507</b>                         | 0.137                            | 0.035                         |
| Weight loss                               | -0.019                        | <b>0.582</b>                         | 0.027                            | -0.278                        |
| Lack of appetite                          | -0.073                        | <b>0.768</b>                         | 0.079                            | -0.260                        |
| Itching                                   | 0.061                         | <b>0.466</b>                         | -0.033                           | 0.295                         |
| Hair loss                                 | -0.039                        | <b>0.443</b>                         | 0.026                            | 0.177                         |
| Change in the way food tastes             | 0.029                         | <b>0.606</b>                         | 0.029                            | 0.100                         |
| “I don’t look like myself”                | 0.241                         | <b>0.418</b>                         | -0.122                           | 0.089                         |
| Changes in skin                           | 0.347                         | <b>0.586</b>                         | -0.249                           | 0.006                         |
| Nausea                                    | 0.104                         | 0.305                                | <b>0.404</b>                     | -0.140                        |
| Feeling bloated                           | 0.034                         | 0.102                                | <b>0.616</b>                     | 0.154                         |
| Diarrhea                                  | 0.018                         | 0.035                                | <b>0.561</b>                     | 0.065                         |
| Abdominal cramps                          | 0.035                         | -0.072                               | <b>0.858</b>                     | 0.004                         |
| Constipation                              | 0.108                         | 0.321                                | 0.200                            | -0.164                        |
| Increased appetite                        | -0.038                        | 0.022                                | 0.297                            | <b>0.785</b>                  |
| Weight gain                               | 0.050                         | -0.003                               | 0.101                            | <b>0.871</b>                  |
| Cough                                     | 0.185                         | 0.295                                | -0.098                           | 0.119                         |
| Dry mouth                                 | 0.157                         | 0.269                                | 0.192                            | 0.049                         |
| Difficulty sleeping                       | 0.361                         | 0.195                                | 0.081                            | 0.081                         |
| Numbness/tingling in hands/feet           | 0.241                         | 0.068                                | 0.190                            | -0.077                        |
| Pain                                      | 0.282                         | 0.056                                | 0.267                            | 0.003                         |
| Sweats                                    | 0.314                         | 0.108                                | 0.159                            | 0.151                         |

<sup>a</sup>Extraction method: unweighted least squares. Rotation method: Geomin (oblique) rotation. Bold fonts indicate factor loading for symptom was >0.40.

Supplementary Table 6. Exploratory Factory Analysis Using Ratings of Symptom Severity Approximately One Week After Chemotherapy Administration (Time 2)<sup>a</sup>

| Symptoms                                  | Factor 1                      | Factor 2                             | Factor 3                      | Factor 4                   |
|-------------------------------------------|-------------------------------|--------------------------------------|-------------------------------|----------------------------|
|                                           | Psychological Symptom Cluster | Chemotherapy-related Symptom Cluster | Weight change Symptom Cluster | Epithelial Symptom Cluster |
| Cough                                     | -0.081                        | <b>0.544</b>                         | 0.173                         | 0.001                      |
| Dry mouth                                 | -0.160                        | <b>0.676</b>                         | 0.015                         | 0.072                      |
| Nausea                                    | 0.037                         | <b>0.615</b>                         | -0.049                        | -0.057                     |
| Feeling bloated                           | 0.192                         | <b>0.443</b>                         | 0.146                         | 0.011                      |
| Change in the way food tastes             | -0.062                        | <b>0.538</b>                         | -0.188                        | 0.320                      |
| Abdominal cramps                          | 0.061                         | <b>0.571</b>                         | 0.041                         | -0.083                     |
| Feeling drowsy                            | 0.208                         | <b>0.440</b>                         | -0.016                        | 0.035                      |
| Sweats                                    | 0.143                         | <b>0.486</b>                         | 0.208                         | -0.052                     |
| Lack of appetite                          | 0.036                         | <b>0.669</b>                         | <b>-0.451</b>                 | 0.088                      |
| Weight loss                               | -0.008                        | <b>0.481</b>                         | <b>-0.430</b>                 | 0.118                      |
| Numbness/tingling in hands/feet           | 0.054                         | <b>0.521</b>                         | 0.022                         | -0.187                     |
| Lack of energy                            | <b>0.435</b>                  | <b>0.430</b>                         | -0.190                        | -0.018                     |
| Difficulty concentrating                  | <b>0.517</b>                  | 0.217                                | 0.043                         | 0.118                      |
| Feeling nervous                           | <b>0.606</b>                  | 0.115                                | 0.090                         | 0.022                      |
| Feeling sad                               | <b>0.811</b>                  | -0.004                               | -0.042                        | 0.072                      |
| Worrying                                  | <b>0.940</b>                  | -0.057                               | -0.025                        | -0.011                     |
| Feeling irritable                         | <b>0.562</b>                  | 0.183                                | -0.033                        | 0.085                      |
| Problems with sexual interest or activity | <b>0.402</b>                  | 0.128                                | 0.103                         | -0.037                     |
| Increased appetite                        | -0.073                        | 0.153                                | <b>0.708</b>                  | 0.085                      |
| Weight gain                               | 0.120                         | -0.041                               | <b>0.781</b>                  | 0.068                      |
| Itching                                   | 0.067                         | 0.132                                | 0.136                         | <b>0.433</b>               |
| Hair loss                                 | 0.082                         | 0.098                                | 0.089                         | <b>0.450</b>               |
| “I don’t look like myself”                | 0.381                         | 0.029                                | -0.031                        | <b>0.459</b>               |
| Changes in skin                           | 0.217                         | -0.044                               | 0.017                         | <b>0.705</b>               |
| Diarrhea                                  | 0.010                         | <b>0.541</b>                         | -0.124                        | -0.161                     |
| Constipation                              | 0.161                         | 0.336                                | -0.023                        | 0.020                      |
| Dizziness                                 | 0.050                         | 0.397                                | -0.003                        | 0.184                      |
| Difficulty sleeping                       | 0.239                         | 0.386                                | 0.100                         | -0.021                     |
| Pain                                      | 0.314                         | 0.354                                | 0.086                         | -0.197                     |

<sup>a</sup>Extraction method: unweighted least squares. Rotation method: Geomin (oblique) rotation. Bold fonts indicate factor loading for symptom was >0.40.

Supplementary Table 7. Exploratory Factory Analysis Using Ratings of Symptom Severity Approximately Two Weeks After Chemotherapy Administration (Time 3)<sup>a</sup>

| Symptoms                                  | Factor 1                      | Factor 2                             | Factor 3                      | Factor 4                   |
|-------------------------------------------|-------------------------------|--------------------------------------|-------------------------------|----------------------------|
|                                           | Psychological Symptom Cluster | Chemotherapy-related Symptom Cluster | Weight change Symptom Cluster | Epithelial Symptom Cluster |
| Difficulty concentrating                  | <b>0.453</b>                  | 0.307                                | 0.026                         | 0.029                      |
| Feeling nervous                           | <b>0.773</b>                  | 0.031                                | 0.027                         | 0.017                      |
| Feeling sad                               | <b>0.872</b>                  | -0.087                               | -0.028                        | 0.115                      |
| Worrying                                  | <b>0.949</b>                  | -0.038                               | -0.051                        | -0.073                     |
| Feeling irritable                         | <b>0.594</b>                  | 0.095                                | -0.029                        | 0.178                      |
| Constipation                              | <b>0.404</b>                  | 0.121                                | 0.010                         | 0.158                      |
| Lack of energy                            | <b>0.429</b>                  | <b>0.516</b>                         | 0.025                         | -0.133                     |
| Cough                                     | -0.036                        | <b>0.428</b>                         | 0.057                         | 0.060                      |
| Dry mouth                                 | -0.010                        | <b>0.518</b>                         | 0.015                         | 0.020                      |
| Nausea                                    | 0.202                         | <b>0.518</b>                         | -0.066                        | -0.044                     |
| Feeling drowsy                            | 0.095                         | <b>0.626</b>                         | 0.105                         | -0.054                     |
| Numbness/tingling in hands/feet           | 0.040                         | <b>0.416</b>                         | 0.144                         | -0.014                     |
| Diarrhea                                  | -0.035                        | <b>0.557</b>                         | -0.156                        | -0.070                     |
| Abdominal cramps                          | 0.259                         | <b>0.423</b>                         | -0.126                        | 0.027                      |
| Dizziness                                 | 0.105                         | <b>0.425</b>                         | 0.145                         | 0.175                      |
| Change in the way food tastes             | -0.100                        | <b>0.440</b>                         | -0.031                        | 0.347                      |
| Lack of appetite                          | 0.036                         | <b>0.629</b>                         | <b>-0.442</b>                 | 0.200                      |
| Weight loss                               | -0.054                        | <b>0.605</b>                         | <b>-0.411</b>                 | 0.249                      |
| Increased appetite                        | -0.076                        | 0.089                                | <b>0.621</b>                  | 0.102                      |
| Weight gain                               | -0.011                        | -0.017                               | <b>1.094</b>                  | 0.051                      |
| Itching                                   | -0.039                        | 0.045                                | 0.115                         | <b>0.483</b>               |
| “I don’t look like myself”                | 0.298                         | 0.024                                | 0.133                         | <b>0.632</b>               |
| Changes in skin                           | 0.261                         | -0.056                               | -0.028                        | <b>0.698</b>               |
| Sweats                                    | 0.348                         | 0.176                                | 0.196                         | -0.004                     |
| Feeling bloated                           | 0.369                         | 0.253                                | 0.045                         | -0.061                     |
| Problems with sexual interest or activity | 0.363                         | 0.129                                | -0.019                        | 0.071                      |
| Hair loss                                 | 0.147                         | 0.153                                | 0.018                         | 0.333                      |
| Difficulty sleeping                       | 0.314                         | 0.341                                | 0.123                         | 0.054                      |
| Pain                                      | 0.314                         | 0.280                                | 0.103                         | -0.103                     |

<sup>a</sup>Extraction method: unweighted least squares. Rotation method: Geomin (oblique) rotation. Bold fonts indicate factor loading for symptom was >0.40.



Supplementary Table 8. Exploratory Factory Analysis Using Ratings of Symptom Distress Prior to the Initiation of Next Dose of Chemotherapy (Time 1)<sup>a</sup>

| Symptoms                                  | Factor 1                      | Factor 2                             | Factor 3                      | Factor 4                         |
|-------------------------------------------|-------------------------------|--------------------------------------|-------------------------------|----------------------------------|
|                                           | Psychological Symptom Cluster | Chemotherapy-related Symptom Cluster | Weight change Symptom Cluster | Gastrointestinal Symptom Cluster |
| Difficulty concentrating                  | <b>0.767</b>                  | -0.030                               | -0.083                        | 0.037                            |
| Feeling nervous                           | <b>0.707</b>                  | -0.060                               | 0.047                         | 0.001                            |
| Feeling sad                               | <b>0.760</b>                  | 0.041                                | 0.084                         | -0.137                           |
| Worrying                                  | <b>0.959</b>                  | -0.166                               | 0.040                         | -0.102                           |
| Feeling irritable                         | <b>0.618</b>                  | 0.071                                | -0.013                        | 0.119                            |
| Lack of energy                            | <b>0.552</b>                  | 0.252                                | -0.235                        | 0.051                            |
| Feeling drowsy                            | <b>0.488</b>                  | 0.240                                | -0.099                        | 0.079                            |
| Difficulty sleeping                       | <b>0.407</b>                  | 0.140                                | 0.030                         | 0.095                            |
| Pain                                      | <b>0.459</b>                  | 0.109                                | 0.002                         | 0.117                            |
| Sweats                                    | <b>0.502</b>                  | 0.031                                | 0.093                         | 0.075                            |
| Dizziness                                 | 0.093                         | <b>0.564</b>                         | 0.031                         | 0.022                            |
| Change in the way food tastes             | 0.046                         | <b>0.559</b>                         | 0.058                         | 0.052                            |
| Lack of appetite                          | -0.041                        | <b>0.807</b>                         | -0.246                        | -0.030                           |
| Weight loss                               | -0.010                        | <b>0.602</b>                         | -0.233                        | 0.048                            |
| Itching                                   | -0.089                        | <b>0.516</b>                         | 0.263                         | 0.024                            |
| “I don’t look like myself”                | 0.187                         | <b>0.537</b>                         | 0.059                         | -0.207                           |
| Changes in skin                           | 0.268                         | <b>0.622</b>                         | 0.034                         | -0.293                           |
| Hair loss                                 | 0.020                         | <b>0.449</b>                         | 0.118                         | 0.100                            |
| Increased appetite                        | -0.004                        | 0.050                                | <b>0.779</b>                  | 0.241                            |
| Weight gain                               | 0.050                         | -0.018                               | <b>0.929</b>                  | 0.001                            |
| Diarrhea                                  | 0.064                         | 0.063                                | 0.087                         | <b>0.620</b>                     |
| Abdominal cramps                          | 0.289                         | -0.029                               | 0.024                         | <b>0.621</b>                     |
| Constipation                              | 0.297                         | 0.279                                | -0.135                        | 0.089                            |
| Cough                                     | 0.066                         | 0.322                                | 0.075                         | 0.028                            |
| Dry mouth                                 | 0.081                         | 0.344                                | 0.113                         | 0.205                            |
| Nausea                                    | 0.252                         | 0.367                                | -0.133                        | 0.262                            |
| Numbness/tingling in hands/feet           | 0.321                         | 0.150                                | -0.046                        | 0.156                            |
| Feeling bloated                           | 0.356                         | 0.103                                | 0.126                         | 0.358                            |
| Problems with sexual interest or activity | 0.384                         | 0.278                                | -0.016                        | -0.170                           |

<sup>a</sup>Extraction method: unweighted least squares. Rotation method: Geomin (oblique) rotation. Bold fonts indicate factor loading for symptom was >0.40.

Supplementary Table 9. Exploratory Factory Analysis Using Ratings of Symptom Distress Approximately One Week After Chemotherapy Administration (Time 2)<sup>a</sup>

| Symptoms                                      | Factor 1                      | Factor 2                             | Factor 3                      | Factor 4                   |
|-----------------------------------------------|-------------------------------|--------------------------------------|-------------------------------|----------------------------|
|                                               | Psychological Symptom Cluster | Chemotherapy-related Symptom Cluster | Weight change Symptom Cluster | Epithelial Symptom Cluster |
| Cough                                         | -0.122                        | <b>0.571</b>                         | 0.200                         | 0.005                      |
| Dry mouth                                     | -0.057                        | <b>0.629</b>                         | 0.065                         | 0.003                      |
| Nausea                                        | 0.061                         | <b>0.564</b>                         | -0.012                        | 0.018                      |
| Feeling drowsy                                | 0.286                         | <b>0.423</b>                         | -0.012                        | 0.031                      |
| Diarrhea                                      | 0.107                         | <b>0.474</b>                         | -0.074                        | -0.123                     |
| Abdominal cramps                              | 0.066                         | <b>0.570</b>                         | 0.104                         | -0.021                     |
| Change in the way food tastes                 | -0.062                        | <b>0.552</b>                         | -0.208                        | 0.351                      |
| Lack of appetite                              | 0.015                         | <b>0.714</b>                         | -0.395                        | 0.098                      |
| Weight loss                                   | 0.041                         | <b>0.536</b>                         | -0.324                        | 0.021                      |
| Sweats                                        | 0.255                         | <b>0.403</b>                         | 0.256                         | -0.047                     |
| Lack of energy                                | <b>0.514</b>                  | 0.339                                | -0.121                        | 0.014                      |
| Difficulty concentrating                      | <b>0.527</b>                  | 0.141                                | -0.050                        | 0.155                      |
| Feeling nervous                               | <b>0.751</b>                  | 0.019                                | 0.017                         | -0.015                     |
| Feeling sad                                   | <b>0.784</b>                  | -0.025                               | 0.010                         | 0.075                      |
| Worrying                                      | <b>0.992</b>                  | -0.193                               | -0.005                        | 0.035                      |
| Feeling irritable                             | <b>0.630</b>                  | 0.105                                | -0.042                        | 0.077                      |
| Difficulty sleeping                           | <b>0.404</b>                  | 0.260                                | 0.099                         | -0.054                     |
| Problems with sexual interest or activity     | <b>0.467</b>                  | 0.010                                | 0.147                         | 0.015                      |
| Increased appetite                            | 0.038                         | 0.081                                | <b>0.726</b>                  | 0.085                      |
| Weight gain                                   | -0.021                        | -0.037                               | <b>0.877</b>                  | 0.207                      |
| Itching                                       | 0.025                         | 0.104                                | 0.117                         | <b>0.469</b>               |
| “I don’t look like myself”                    | 0.236                         | 0.061                                | 0.034                         | <b>0.511</b>               |
| Changes in skin                               | 0.089                         | -0.064                               | -0.020                        | <b>0.820</b>               |
| Hair loss                                     | 0.094                         | 0.067                                | 0.067                         | <b>0.489</b>               |
| Constipation                                  | 0.147                         | 0.309                                | 0.071                         | 0.095                      |
| Numbness and/or tingling in hands and/or feet | 0.210                         | 0.376                                | -0.008                        | -0.112                     |
| Dizziness                                     | 0.082                         | 0.345                                | 0.011                         | 0.196                      |
| Feeling bloated                               | 0.231                         | 0.390                                | 0.199                         | 0.031                      |
| Pain                                          | 0.384                         | 0.266                                | 0.167                         | -0.098                     |

<sup>a</sup>Extraction method: unweighted least squares. Rotation method: Geomin (oblique) rotation. Bold fonts indicate factor loading for symptom was >0.40.

Supplementary Table 10. Exploratory Factory Analysis Using Ratings of Symptom Distress Approximately Two Weeks After Chemotherapy Administration (Time 3)<sup>a</sup>

| Symptoms                                  | Factor 1                      | Factor 2                             | Factor 3                      | Factor 4                   |
|-------------------------------------------|-------------------------------|--------------------------------------|-------------------------------|----------------------------|
|                                           | Psychological Symptom Cluster | Chemotherapy-related Symptom Cluster | Weight change Symptom Cluster | Epithelial Symptom Cluster |
| Lack of energy                            | <b>0.524</b>                  | 0.378                                | -0.021                        | 0.013                      |
| Difficulty concentrating                  | <b>0.485</b>                  | 0.232                                | 0.054                         | 0.102                      |
| Feeling nervous                           | <b>0.729</b>                  | 0.060                                | 0.045                         | -0.136                     |
| Feeling sad                               | <b>0.969</b>                  | -0.188                               | -0.024                        | 0.071                      |
| Worrying                                  | <b>0.959</b>                  | -0.059                               | 0.014                         | -0.157                     |
| Feeling irritable                         | <b>0.642</b>                  | 0.117                                | -0.081                        | 0.077                      |
| Constipation                              | <b>0.422</b>                  | 0.150                                | -0.001                        | 0.150                      |
| Cough                                     | -0.055                        | <b>0.528</b>                         | 0.037                         | -0.049                     |
| Dry mouth                                 | 0.025                         | <b>0.506</b>                         | 0.046                         | -0.027                     |
| Nausea                                    | 0.253                         | <b>0.479</b>                         | -0.040                        | -0.038                     |
| Feeling drowsy                            | 0.202                         | <b>0.520</b>                         | 0.050                         | 0.028                      |
| Diarrhea                                  | 0.072                         | <b>0.462</b>                         | -0.103                        | -0.089                     |
| Abdominal cramps                          | 0.233                         | <b>0.462</b>                         | -0.129                        | -0.093                     |
| Change in the way food tastes             | -0.021                        | <b>0.482</b>                         | -0.039                        | 0.275                      |
| Lack of appetite                          | 0.026                         | <b>0.705</b>                         | <b>-0.467</b>                 | 0.044                      |
| Weight loss                               | -0.077                        | <b>0.645</b>                         | <b>-0.446</b>                 | 0.092                      |
| Increased appetite                        | -0.092                        | 0.099                                | <b>0.652</b>                  | 0.334                      |
| Weight gain                               | 0.026                         | -0.041                               | <b>0.965</b>                  | 0.348                      |
| Itching                                   | 0.002                         | 0.026                                | 0.023                         | <b>0.526</b>               |
| “I don’t look like myself”                | 0.394                         | 0.047                                | 0.034                         | <b>0.584</b>               |
| Changes in skin                           | <b>0.432</b>                  | -0.041                               | -0.128                        | <b>0.624</b>               |
| Difficulty sleeping                       | 0.336                         | 0.314                                | 0.137                         | 0.101                      |
| Problems with sexual interest or activity | <b>0.418</b>                  | 0.071                                | -0.142                        | 0.060                      |
| Sweats                                    | 0.331                         | 0.205                                | 0.271                         | -0.026                     |
| Hair loss                                 | 0.258                         | 0.187                                | 0.012                         | 0.300                      |
| Numbness/tingling in hands/feet           | 0.212                         | 0.378                                | 0.176                         | -0.079                     |
| Dizziness                                 | 0.179                         | 0.363                                | 0.116                         | 0.226                      |
| Feeling bloated                           | 0.378                         | 0.233                                | 0.129                         | -0.060                     |
| Pain                                      | 0.381                         | 0.265                                | 0.048                         | -0.085                     |

<sup>a</sup>Extraction method: unweighted least squares. Rotation method: Geomin (oblique) rotation. Bold fonts indicate factor loading for symptom was >0.40.
